# Supplementary material for: Development and Validation of Ischemic Events Related Signature After Carotid Endarterectomy
Source: Front Cell Dev Biol. 2022 Mar 17;10:794608. doi: 10.3389/fcell.2022.794608 (PMC8969028; doi:10.3389/fcell.2022.794608)
Supplement: Supplementary file 1 [file Table1.XLSX]

## Sheet: Table S1
Table S1. Details of baseline information of GSE21545 and inhouse cohorts.
Charateristics	Inhouse-cohort	GSE21545	Training dataset	Validation dataset
Age
<=60	10 (20.0)	16 (17.0)	12 (18.2)	4 (14.3)
>60	40 (80.0)	77 (81.9)	53 (80.3)	24 (85.7)
Unavailable		1 (1.1)	1 (1.5)
Sex
Male	38 (76.0)
Female	12 (24.0)
Ischime events
Yes	13 (26.0)	20 (21.3)	14 (21.2)	6 (21.4)
No	37 (74.0)	74 (28.7)	52 (88.8)	22 (28.6)
All sample	50	94	66	28

## Sheet: Table S2
Table S2. The risk socre of each patients in the GSE21545 and inhouse cohorts
GSE21545	risk score	Inhouse cohort	risk score
GSM892518	-1.11089	Patient 1	-1.55181
GSM892519	-1.50935	Patient 2	-1.52401
GSM892520	-1.32139	Patient 3	-1.55229
GSM892521	-0.81096	Patient 4	-1.54676
GSM892523	-2.50463	Patient 5	-1.53923
GSM892525	-1.97164	Patient 6	-1.54683
GSM892526	-0.699502	Patient 7	-1.5148
GSM892527	-2.57758	Patient 8	-1.57247
GSM892528	-2.29267	Patient 9	-1.57828
GSM892529	-1.59412	Patient 10	-1.55865
GSM892530	-1.66348	Patient 11	-1.53203
GSM892532	-0.88342	Patient 12	-1.57014
GSM892533	-2.32065	Patient 13	-1.57963
GSM892534	-1.98512	Patient 14	-1.55182
GSM892535	-2.11353	Patient 15	-1.51714
GSM892536	-2.13971	Patient 16	-1.58209
GSM892537	-1.03404	Patient 17	-1.58075
GSM892538	-2.04805	Patient 18	-1.49345
GSM892539	-2.4507	Patient 19	-1.571
GSM892540	-1.47051	Patient 20	-1.55236
GSM892541	-1.48508	Patient 21	-1.64506
GSM892542	-1.23993	Patient 22	-1.56667
GSM892543	-0.896127	Patient 23	-1.5422
GSM892544	-1.8842	Patient 24	-1.53717
GSM892545	-1.37616	Patient 25	-1.55565
GSM892546	-2.51389	Patient 26	-1.58228
GSM892547	-2.89226	Patient 27	-1.475
GSM892548	-2.05271	Patient 28	-1.61287
GSM892549	-1.23602	Patient 29	-1.53277
GSM892550	-0.741146	Patient 30	-1.50444
GSM892551	-0.981523	Patient 31	-1.54336
GSM892552	-1.82725	Patient 32	-1.54353
GSM892553	-2.94989	Patient 33	-1.52113
GSM892554	-1.13919	Patient 34	-1.56313
GSM892555	-1.78197	Patient 35	-1.5771
GSM892556	-0.894916	Patient 36	-1.55429
GSM892557	-0.716178	Patient 37	-1.62037
GSM892558	-2.3757	Patient 38	-1.5285
GSM892559	-0.974671	Patient 39	-1.5192
GSM892560	-1.79862	Patient 40	-1.45557
GSM892561	0.0316807	Patient 41	-1.53813
GSM892562	-2.34444	Patient 42	-1.5402
GSM892563	-0.729914	Patient 43	-1.55767
GSM892564	-1.2171	Patient 44	-1.56546
GSM892565	-0.892474	Patient 45	-1.43522
GSM892566	-2.05624	Patient 46	-1.54667
GSM892567	-1.09151	Patient 47	-1.4708
GSM892568	-1.45058	Patient 48	-1.50837
GSM892569	-0.458947	Patient 49	-1.4882
GSM892570	-1.48522	Patient 50	-1.50676
GSM892571	-1.51467
GSM892572	-1.63497
GSM892573	-2.33308
GSM892574	-1.62004
GSM892575	-2.55972
GSM892576	-1.5148
GSM892577	-1.29313
GSM892578	-2.24343
GSM892579	-1.91908
GSM892580	-2.15119
GSM892581	-0.448197
GSM892582	-0.796371
GSM892583	-1.48927
GSM892584	-2.30499
GSM892585	-2.11106
GSM892586	-1.58755
GSM892587	-1.91834
GSM892588	-2.45661
GSM892589	-2.18395
GSM892590	-1.51342
GSM892591	-0.676722
GSM892592	-1.73091
GSM892593	-1.99762
GSM892594	-1.7483
GSM892595	-1.30062
GSM892596	-2.32863
GSM892597	-1.91359
GSM892598	-0.679644
GSM892599	-2.24766
GSM892600	-0.523747
GSM892601	-0.519141
GSM892602	-1.90127
GSM892603	-3.54164
GSM892604	-2.6647
GSM892605	-0.721247
GSM892606	-2.70801
GSM892607	-1.17469
GSM892608	-1.15398
GSM892609	-2.51069
GSM892610	-0.27013
GSM892611	-1.8878
GSM892612	-2.04204
GSM892613	-0.933563
GSM892614	-0.615655
